# Supplementary material for: Elemental Fingerprinting of Wild and Farmed Fish Muscle to Authenticate and Validate Production Method
Source: MDPI journal article supplement (doi:10.3390/foods11193081), 2022-10-04
Supplement: s1 [file s1]

**Table S1.** Range of elemental concentrations of *Sparus aurata* muscle (mg/Kg wet weight) collected at the four sampling origins: Olhão - wild (OW), Olhão -aquaculture in earth ponds (OP), Olhão - sea cage aquaculture (OC), Madeira - sea cage aquaculture (MC).

|           | <b>OW</b>       | <b>OP</b>       | <b>OC</b>       | <b>MC</b>        | <b>Overall</b>  |
|-----------|-----------------|-----------------|-----------------|------------------|-----------------|
| <b>As</b> | 0.983-15.439    | 0.260-8.323     | 1.322-3.729     | 0.746-2.455      | 0.260-15.439    |
| <b>Br</b> | 1.309-9.830     | 0.997-3.641     | 1.099-3.865     | 1.099-5.968      | 0.997-9.830     |
| <b>Ca</b> | 55.910-1066.454 | 67.227-1051.629 | 52.028-452.183  | 26.034-327.886   | 26.034-1066.454 |
| <b>Cl</b> | 0-509.460       | 19.149-290.047  | 8.888-466.707   | 9.195-436.461    | 0-509.460       |
| <b>Cr</b> | 0-0.301         | 0               | 0               | 0-0.547          | 0-0.547         |
| <b>Cu</b> | 0.305-0.841     | 0.140-0.871     | 0.248-1.139     | 0.335-1.081      | 0.140-1.139     |
| <b>Fe</b> | 3.071-58.538    | 3.207-48.519    | 2.150-55.494    | 1.841-49.487     | 1.841-58.538    |
| <b>Hg</b> | 0-0.146         | 0-0.085         | 0-0.506         | 0-0.064          | 0-0.506         |
| <b>K</b>  | 3881.52-9181.29 | 5134.68-9624.66 | 2074.29-8099.59 | 2558.683-7893.87 | 2074.29-9624.66 |
| <b>Mn</b> | 0-0.503         | 0-0.790         | 0-0.446         | 0-0.350          | 0-0.790         |
| <b>Na</b> | 2537.97-6054.56 | 2745.02-6012.44 | 3376.06-7532.96 | 2957.02-7946.94  | 2537.97-7946.94 |
| <b>Ni</b> | 0-0.067         | 0-0.313         | 0-0.475         | 0                | 0-0.475         |
| <b>P</b>  | 952.46-4242.26  | 1543.85-4045.39 | 471.45-2817.22  | 477.58-3941.47   | 471.45-4242.26  |
| <b>Pb</b> | 0-2.703         | 0.127-2.065     | 0-1.113         | 0-0.605          | 0-2.703         |
| <b>Pr</b> | 0-1.745         | 0-2.665         | 0-1.656         | 0-1.623          | 0-2.665         |
| <b>Rb</b> | 1.962-4.829     | 2.280-4.418     | 1.949-7.635     | 2.244-9.223      | 1.949-9.223     |
| <b>S</b>  | 0-4008.38       | 1417.75-3447.49 | 459.62-2277.36  | 456.30-3058.85   | 0-4008.38       |
| <b>Sb</b> | 0-3.843         | 0-3.677         | 0-3.688         | 0-4.664          | 0-4.664         |
| <b>Se</b> | 0.255-2.788     | 0.360-0.565     | 0.321-0.498     | 0.124-0.261      | 0.124-2.788     |
| <b>Sm</b> | 0-2.487         | 0-2.470         | 0-1.380         | 0-1.185          | 0-2.487         |
| <b>Sr</b> | 0-7.487         | 0.117-10.052    | 0-2.868         | 0-2.171          | 0-10.052        |
| <b>Ti</b> | 0-0.637         | 0-0.883         | 0-1.327         | 0-2.408          | 0-2.408         |
| <b>V</b>  | 0-0.728         | 0-0.671         | 0               | 0-1.076          | 0-1.076         |
| <b>Y</b>  | 0-5.116         | 0-5.218         | 0-5.105         | 0-4.629          | 0-5.218         |
| <b>Zn</b> | 7.321-18.807    | 7.678-15.488    | 7.400-18.369    | 6.502-13.386     | 6.502-18.807    |
